# Supplementary material for: On-demand optogenetic activation of human stem-cell-derived neurons
Source: Springer Nature journal article supplement (doi:10.1038/s41598-017-14827-6), 2017-10-25
Supplement: MOESM1 [file 41598_2017_14827_MOESM1_ESM.pdf]

## Supplementary figures and figure legends.

### On-demand optogenetic activation of human stem-cell-derived neurons

Simon D Klapper<sup>1\*</sup>, Evelyn J Sauter<sup>1\*</sup>, Anka Swiersy<sup>1</sup>, Max AE Hyman<sup>1</sup>, Christian Bamann<sup>2</sup>, Ernst Bamberg<sup>2</sup> & Volker Busskamp<sup>1#</sup>

1 Center for Regenerative Therapies Dresden (CRTD), Technische Universität Dresden, Dresden, Germany

2 Max Planck Institute of Biophysics, Frankfurt, Germany

\* These authors contributed equally to this work.

# Corresponding author: volker.busskamp@tu-dresden.de

### Supplementary Figure 1

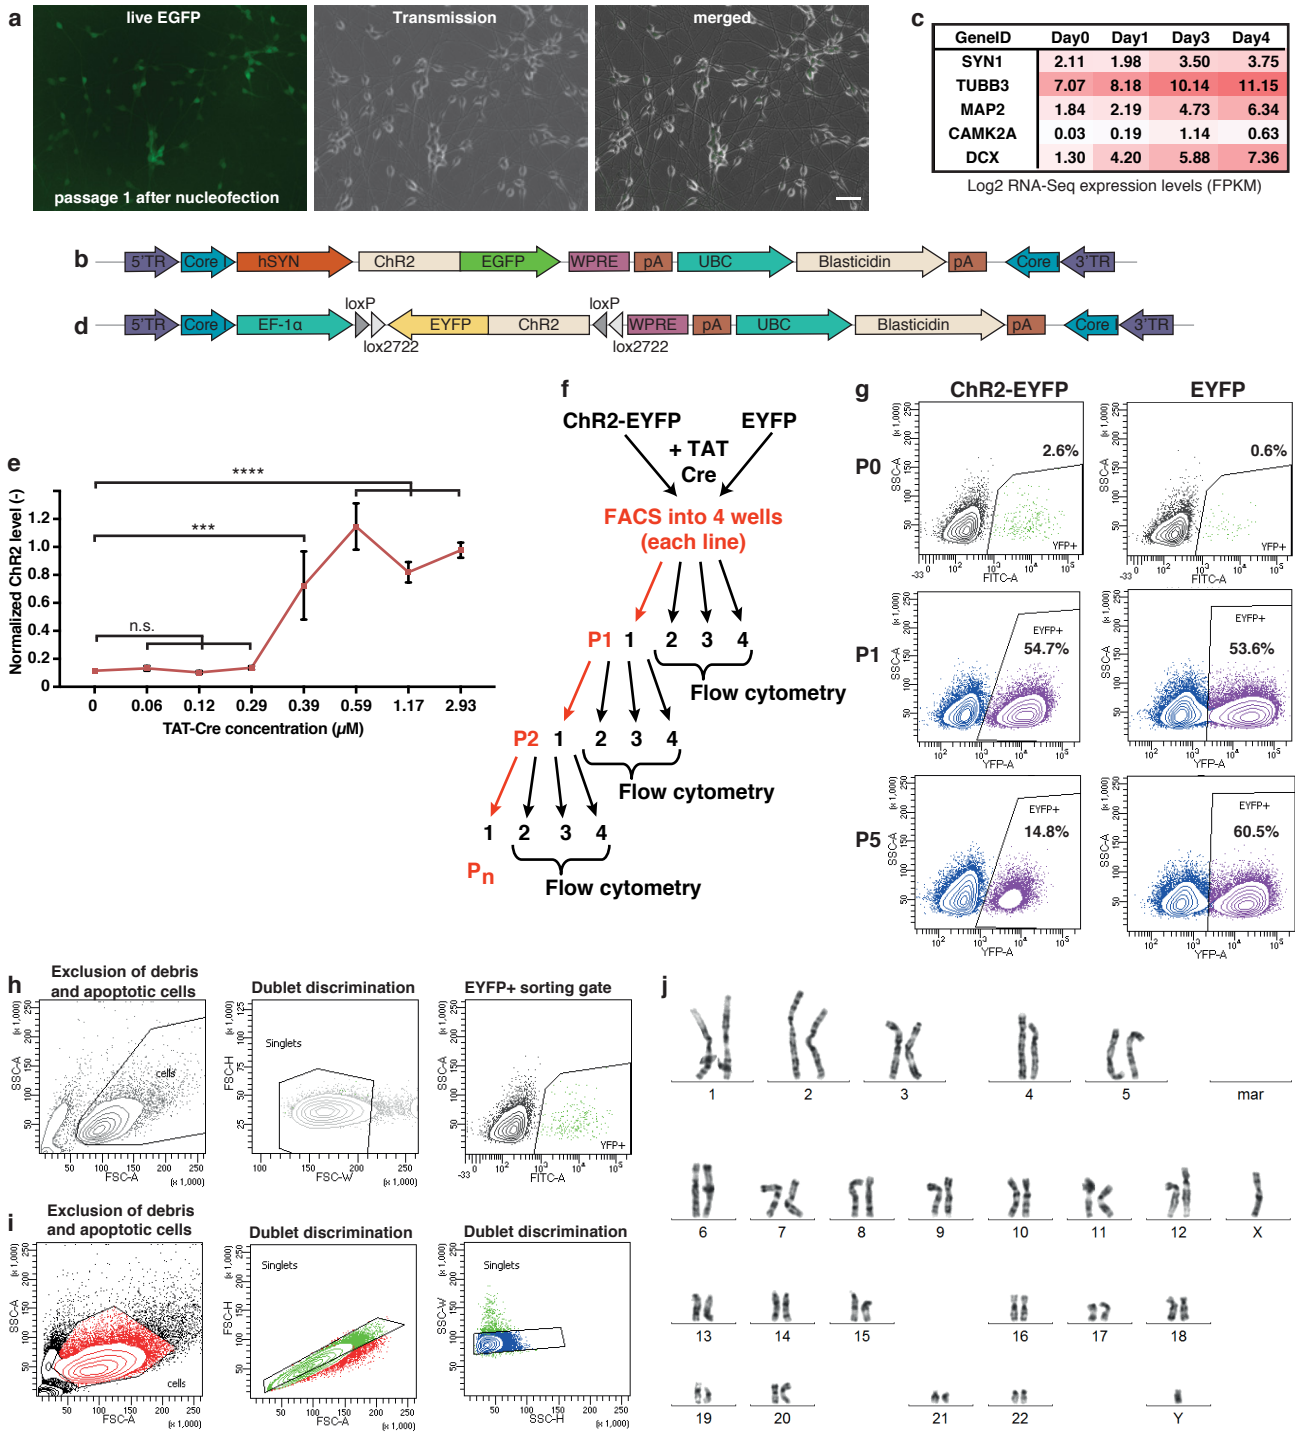

### Supplementary Figure 1.

- a) Example images of induced iNGN cells expressing genomically integrated ChR2-EGFP under a human synapsin promoter one passage after nucleofection. EGFP fluorescence (green, left), transmission (middle), and merge (right) images are shown. Scale bar, 50  $\mu\text{m}$ .
- b) Detailed, linearised map of piggyBac-Syn-CatCh-EGFP-UBC-Bla plasmid.
- c) RNA-seq data on expression levels of neuronal markers during neuronal differentiation of iNGN cells, data taken from<sup>5</sup>.
- d) Detailed, linearised map of piggyBac-eDIO-ChR2-EYFP plasmid.
- e) qRT-PCR data showing expression level of ChR2 at different TAT-Cre concentrations. 0.59  $\mu\text{M}$  was the most efficient concentration (0.06  $\mu\text{M}$ :  $p = 0.9998$ , 0.12  $\mu\text{M}$ :  $p = 0.9999$ , 0.29  $\mu\text{M}$ :  $p = 0.9997$ , 0.36  $\mu\text{M}$ :  $p = 0.0001$ , 0.59  $\mu\text{M}$ :  $p = 0.0001$ , 1.12  $\mu\text{M}$ :  $p = 0.0001$ , 2.93  $\mu\text{M}$ :  $p = 0.0001$ ; 1-way ANOVA with Dunnett method versus 0  $\mu\text{M}$  CTRL,  $n = 6$  culture wells).
- f) Scheme of the flow cytometry approach. After TAT-Cre treatment, cells were sorted for EYFP fluorescence and sequentially passaged 6 times into 4 wells. At every passage, 3 wells were analysed in the flow cytometer, and cells in the remaining well proliferated for the next passage.
- g) Example flow cytometry data. At P0, EYFP-positive cells (green) were sorted as the starting population. The raw data show the reduction in EYFP-positive cells (purple) at P1 and P5.
- h) Gating strategy used for sorting the EYFP-positive stem cells (see Methods).
- i) Gating strategy used to analyse EYFP-positive stem cells 6 sequential passages after sorting (see Methods).
- j) Karyogram of Cre-induced and FACS-sorted ChR2-EYFP cells. No chromosomal aberrations could be found.

Scale bar, 50  $\mu\text{m}$ . \*  $p < 0.05$ , \*\*  $p < 0.01$ , \*\*\*  $p < 0.001$ , \*\*\*\*  $p < 0.0001$ , n.s., not significant.

## Supplementary Figure 2

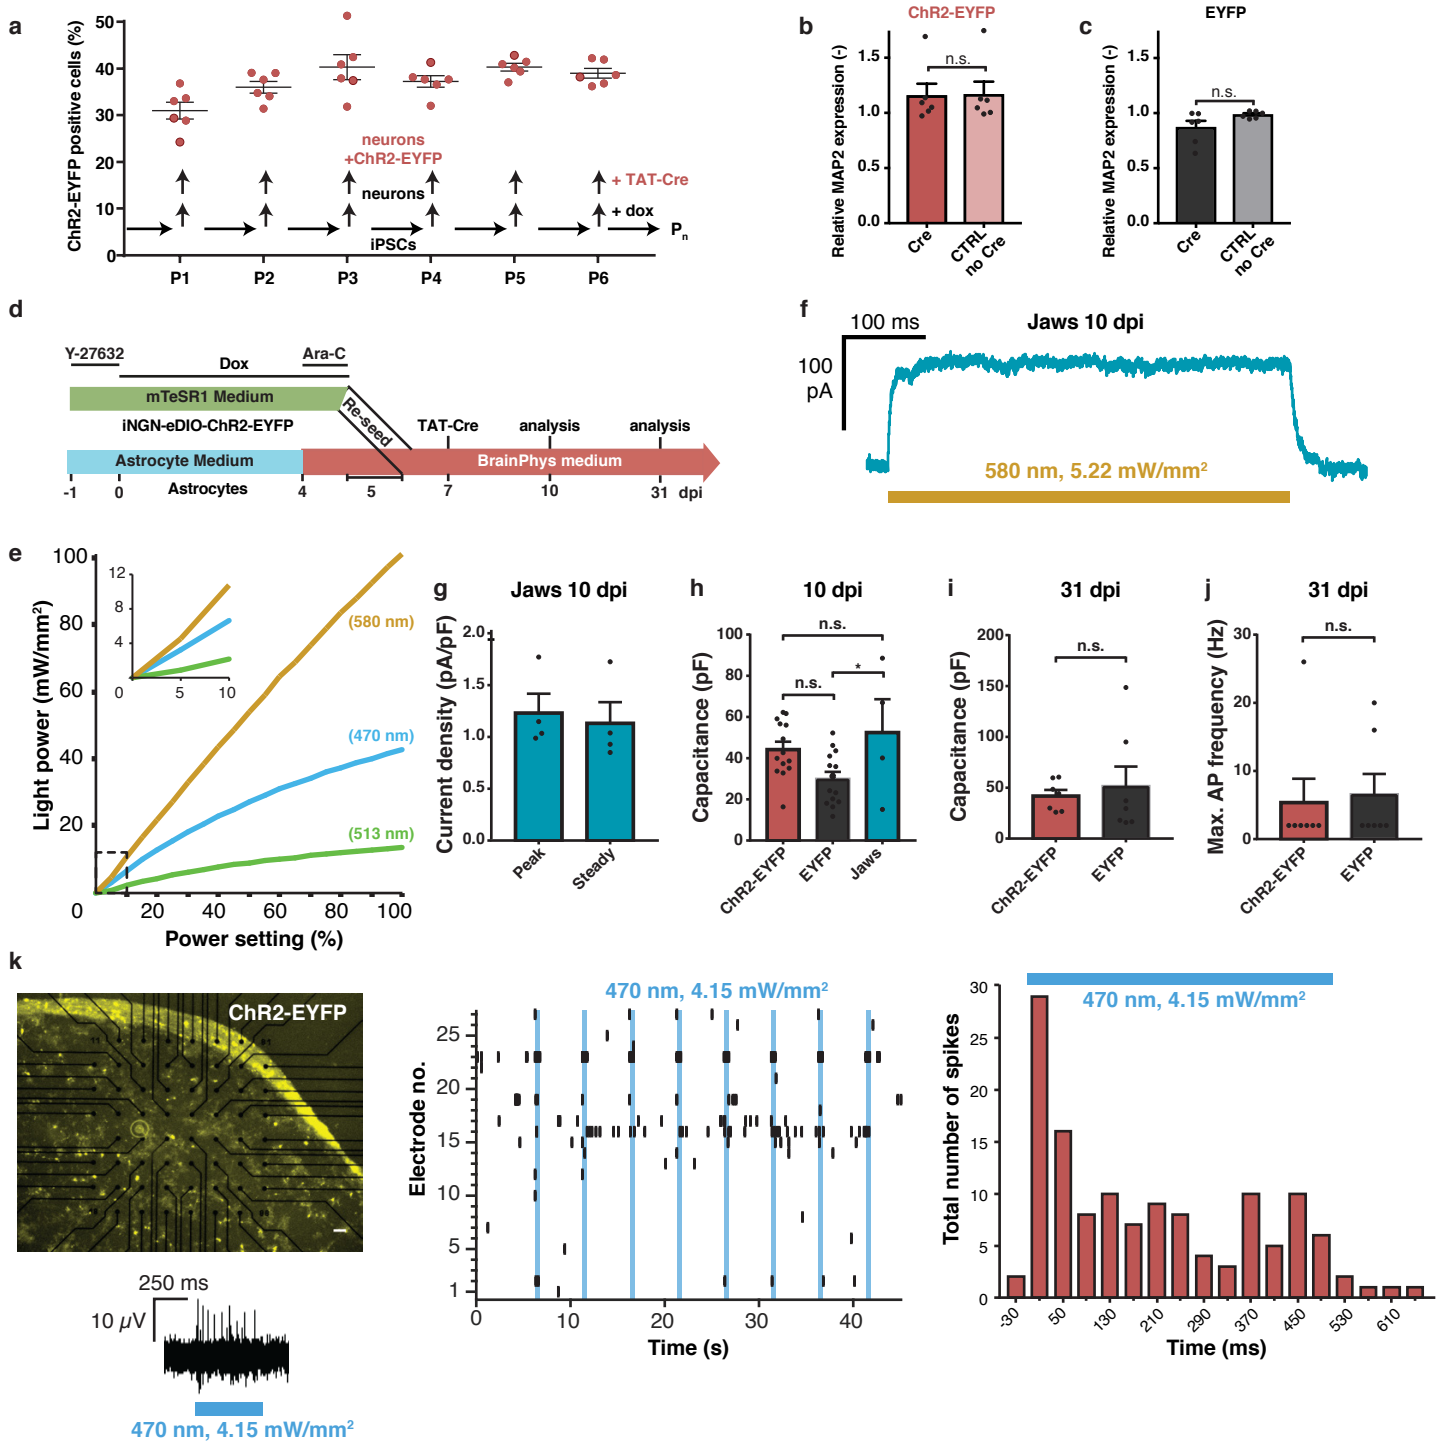

## Supplementary Figure 2.

- a) Quantification of neurons expressing ChR2-EYFP at 7 dpi. iPSCs were passaged multiple times ( $P_n$ ) and differentiated into neurons at every passage, followed by TAT-Cre-mediated activation at 4 dpi. Passaging of iPSCs did not affect the efficiency of ChR2-EYFP expression upon TAT-Cre activation, highlighting the stability of the cell line.
- b) qRT-PCR data showing MAP2 expression in ChR2-EYFP cells after TAT-Cre treatment compared to no-Cre CTRL. TAT-Cre treatment did not affect MAP2 expression levels ( $p > 0.9999$ , Mann-Whitney test,  $n = 6$  culture wells).
- c) qRT-PCR data showing MAP2 expression in EYFP cells after TAT-Cre treatment compared to no-Cre CTRL. TAT-Cre treatment did not affect MAP2 expression levels ( $p = 0.0649$ , Mann-Whitney test,  $n = 6$  culture wells).
- d) Scheme of cell culture and treatment outline for electrophysiological recordings.
- e) Output light power of Spectra4 light engine measured at the focal plane of the patch-clamp setup. Inset shows range of intensities used.
- f) Example traces of voltage-clamp recordings from iNGN-eDIO-Jaws at 10 dpi. Neurons were excited using light pulses of 500 ms.
- g) Quantification of peak and steady current density for iNGN-eDIO-Jaws ( $n = 4$  cells).
- h) Quantification of capacitance at 10 dpi. The capacitance of neurons expressing Jaws-EGFP was different from those expressing EYFP (ChR2 vs. EYFP:  $p = 0.0613$ , EYFP vs. Jaws:  $p = 0.0481$ , Jaws vs. ChR2:  $p = 0.6417$ , 1-way ANOVA with Tukey method,  $n = 14$  cells from 4 cover slips from 2 preparations, Jaws:  $n = 4$  cells).
- i) Quantification of capacitance at 31 dpi. There was no difference between neurons expressing ChR2-EYFP and EYFP ( $p = 0.535$ , Mann-Whitney test,  $n = 7$  cells from 3 cover slips).

- j) Quantification of maximum spike frequency at 31 dpi. There was no difference between neurons expressing ChR2-EYFP and EYFP ( $p > 0.999$ , Mann-Whitney test,  $n = 7$  cells from 3 cover slips).
- k) Example MEA recording at 17 dpi. Left: iNGN cells expressing ChR2-EYFP (yellow, scale bar, 100  $\mu\text{m}$ ) and example trace of filtered data from one electrode upon light stimulus. Middle: raster plot of active electrodes (27 of 59) during eight light stimuli, black bars represent single spikes and blue bars represent 500 ms light stimuli. Right: post-stimulus timing histogram, sum of spikes from all 59 electrodes and 10 light pulses.
